# Supplementary material
Source: Springer Nature journal article supplement (https://www.springermedizin.de/resource/supplementary/12936_2010_1382_MOESM4_ESM.pdf/9549668)

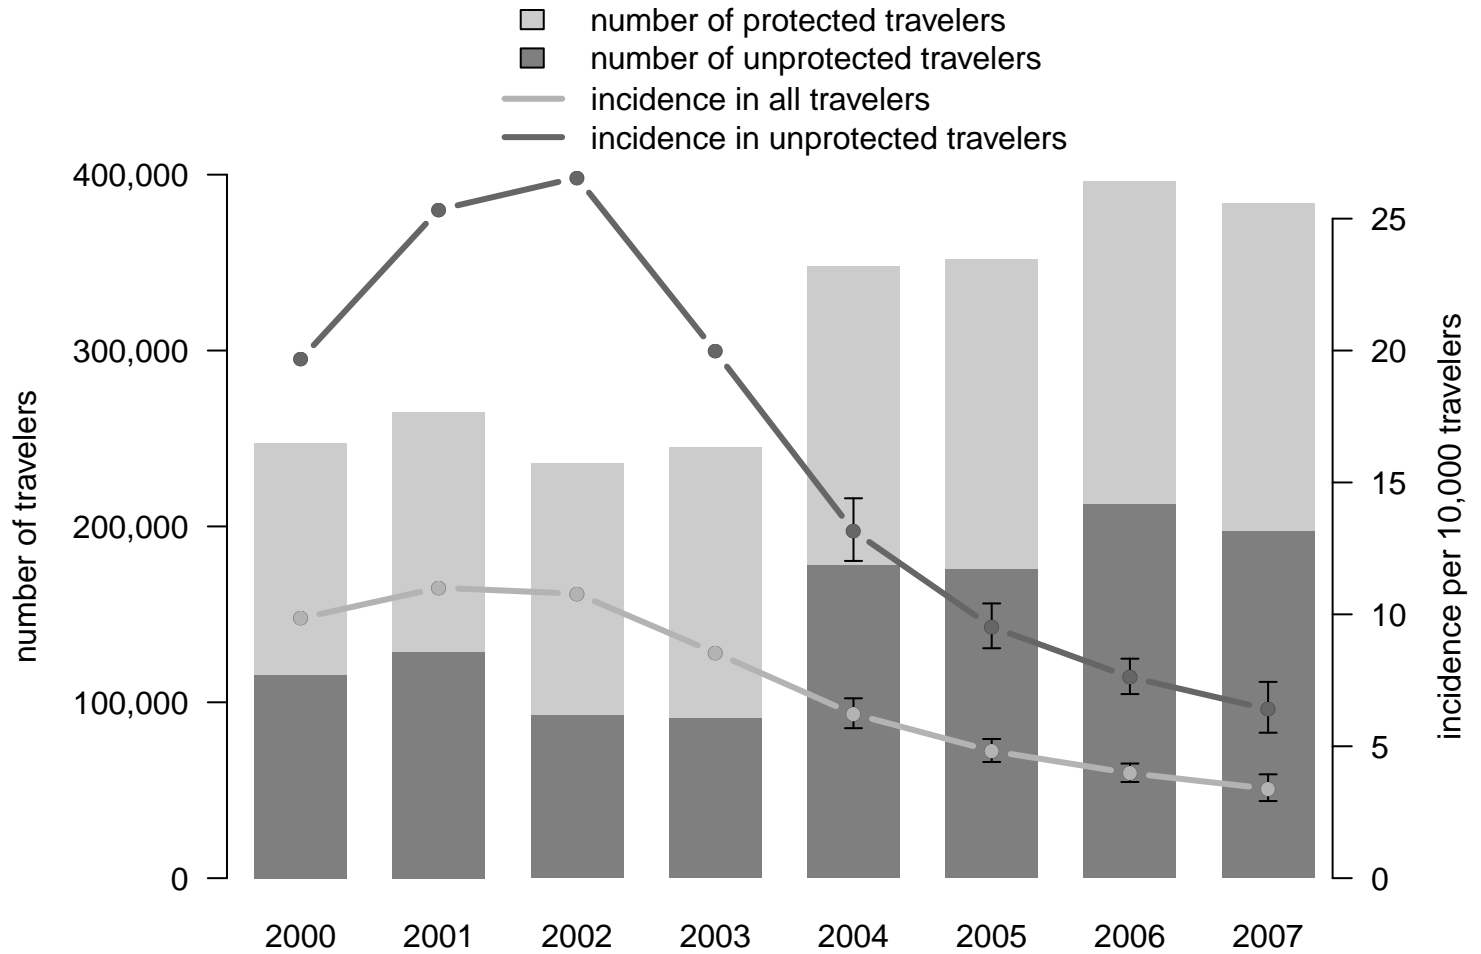

Supplement: MOESM4 [file 9549668]
